# Supplementary material for: A HML6 endogenous retrovirus on chromosome 3 is upregulated in amyotrophic lateral sclerosis motor cortex
Source: PubMed Central journal article supplement (PMC8275748; doi:10.1038/s41598-021-93742-3), 2021-07-12
Supplement: 41598_2021_93742_MOESM1_ESM.pdf [file 41598_2021_93742_MOESM1_ESM.pdf]

## SUPPLEMENTARY INFORMATION

### **A HML6 endogenous retrovirus on chromosome 3 is upregulated in amyotrophic lateral sclerosis motor cortex**

Ashley R Jones<sup>1</sup>, Alfredo Iacoangeli<sup>1,2,3</sup>, Brett N Adey<sup>2,4</sup>, Harry Bowles<sup>1,2,3,5</sup>, Aleksey Shatunov<sup>1</sup>, Claire Troakes<sup>6</sup>, Jeremy A Garson<sup>7</sup>, Adele L McCormick<sup>8</sup>, Ammar Al-Chalabi<sup>1</sup>

<sup>1</sup>Department of Basic & Clinical Neuroscience, Maurice Wohl Clinical Neuroscience Institute, Institute of Psychiatry, Psychology and Neuroscience, King's College London, London, UK SE5 9NU

<sup>2</sup>Department of Biostatistics and Health Informatics, Institute of Psychiatry, Psychology and Neuroscience, King's College London, London UK

<sup>3</sup>National Institute for Health Research Biomedical Research Centre and Dementia Unit at South London and Maudsley NHS Foundation Trust and King's College London, London, UK

<sup>4</sup>Social Genetic and Developmental Psychiatry Centre, Institute of Psychiatry, Psychology & Neuroscience, King's College London, UK; and NIHR Maudsley Biomedical Research Centre, South London and Maudsley NHS Trust, King's College London, UK

<sup>5</sup>National Institute for Health Research Biomedical Research Centre at Guy's and St Thomas' NHS Foundation Trust and King's College London, London, UK

<sup>6</sup>MRC London Neurodegenerative Diseases Brain Bank, Institute of Psychiatry, Psychology and Neuroscience, King's College London, London UK

<sup>7</sup>Division of Infection and Immunity, University College London, London, UK

<sup>8</sup>School of Life Sciences, University of Westminster, London, UK

## **Supplementary Methods**

### **RNA-sequencing protocol for samples from the MRC London Neurodegenerative Diseases Brain Bank (King's College London)**

#### **Purification, isolation and quality control**

The 100mg frozen tissue blocks were divided; one for RNA purification and the other for DNA. For each sample, a 30mg tissue block for RNA was homogenised using a Qiagen PowerLyzer 24 Homogenizer. Total RNA was purified from the homogenate using the standard protocol of the RNeasy Lipid Tissue Mini Kit (Qiagen), with on-column DNase digestion. RNA integrity was estimated using Agilent Bioanalyzer 2100's RNA 6000 Nano assays. RNA quantification was performed using a NanoDrop.

#### **Library preparation and RNA sequencing**

Library preparation was performed using the standard Illumina TruSeq Stranded Total RNA Sample Preparation Guide with Ribo-Zero Human/Mouse/Rat (October 2013 Rev E.). Fragmentation steps were tailored to degrees of degraded RNA samples using Agilent Bioanalyzer 2100's Nano assay results from the previous section. Libraries were validated using an Agilent Bioanalyzer 2100 to assess fragment size distribution. Library concentrations were estimated using a Qubit RNA High Sensitivity Assay Kit. Nanomolar (nM) concentrations were estimated using:  $nM = ng/ul \times (1500/Average\ bp)$ . Libraries were sequenced using Illumina HiSeq 4000 flow cells with 150bp paired-end reads with a target depth of 30 million clusters (60 million reads per sample).

#### **Post-sequencing Quality Control, Alignment and Normalisation**

For all RNA-sequence datasets we used MultiQC<sup>1</sup> to assess read quality pre- and post- alignment. SortMeRNA<sup>2</sup> was used to filter and remove ribosomal RNA transcripts using rRNA reference databases. Clip adapter sequences and low-quality reads were removed using BBDuk (<http://jgi.doe.gov/data-and-tools/bb-tools/>). We used STAR v2.7<sup>3</sup> and GRCh38.89 reference assemblies for alignment of RNA-sequenced reads.

To quantify locus-specific expression of ERVs we used a modified ERVMap pipeline and the ERVMap database. ERVMap ERV loci are selected by their potential to be autonomous full-length proviruses and provides a reference ERVome for accurate locus-specific ERV quantification using RNA-seq data (3237 ERV loci). Please see Tokuyama et al. 2018<sup>4</sup> for details on the ERV-specific RNA-sequencing pipeline. We modified the pipeline, replacing TopHat<sup>5</sup> aligner with STAR v2.7<sup>3</sup>. ERVMap transcript identifiers were matched with RepeatMasker loci identifiers<sup>6</sup>.

Tximport<sup>7</sup> and DESeq2<sup>8</sup> was used to import transcript abundances into R Statistics 4.0.1. Read counts with a total less than 10 were removed. Where possible, the following sample-level phenotype and batch data was imported into R Statistics: disease status, gender, age (categorised into quintiles), *post-mortem* delay (categorised into quintiles), RIN (RNA Integrity Number), and flow-cell. Surrogate variable analyses were performed using SVA and SVAs<sup>9</sup>, while controlling for known covariates, where surrogate variables were appended to each sample. This is to estimate heterogeneity due to extraneous variables (such as cell heterogeneity and missing covariates). Data was normalised using variance stabilising transformations (VST) for use with analyses other than DESeq2 differential expression analyses.

1. Ewels, P., Magnusson, M., Lundin, S. & Källér, M. MultiQC: summarize analysis results for multiple tools and samples in a single report. *Bioinformatics* **32**, 3047–3048 (2016).
2. Kopylova, E., Noé, L. & Touzet, H. SortMeRNA: fast and accurate filtering of ribosomal RNAs in metatranscriptomic data. *Bioinformatics* **28**, 3211–3217 (2012).
3. Dobin, A. *et al.* STAR: ultrafast universal RNA-seq aligner. *Bioinformatics* **29**, 15–21 (2013).
4. Tokuyama, M. *et al.* ERVmap analysis reveals genome-wide transcription of human endogenous retroviruses. *Proc. Natl. Acad. Sci. U. S. A.* **115**, 12565–12572 (2018).
5. Trapnell, C., Pachter, L. & Salzberg, S. L. TopHat: discovering splice junctions with RNA-Seq. *Bioinformatics* **25**, 1105–1111 (2009).
6. Smit, A., Hubley, R. & Green, P. RepeatMasker.
7. Sonesson, C., Love, M. I. & Robinson, M. D. Differential analyses for RNA-seq: transcript-level estimates improve gene-level inferences. *F1000Research* **4**, 1521 (2016).
8. Love, M. I., Huber, W. & Anders, S. Moderated estimation of fold change and dispersion for RNA-seq data with DESeq2. *Genome Biol.* **15**, 550 (2014).
9. Leek, J. T. svaseq: removing batch effects and other unwanted noise from sequencing data. *Nucleic Acids Res.* **42**, e161–e161 (2014).
10. Kanehisa, M., Furumichi, M., Sato, Y., Ishiguro-Watanabe, M. & Tanabe, M. KEGG: Integrating viruses and cellular organisms. *Nucleic Acids Res.* **49**, D545–D551 (2021).
11. Kanehisa, M. Toward understanding the origin and evolution of cellular organisms. *Protein Science* vol. 28 1947–1951 (2019).
12. Kanehisa, M. & Goto, S. KEGG: Kyoto Encyclopedia of Genes and Genomes. *Nucleic Acids Research* vol. 28 27–30 (2000).

## Supplementary Figures

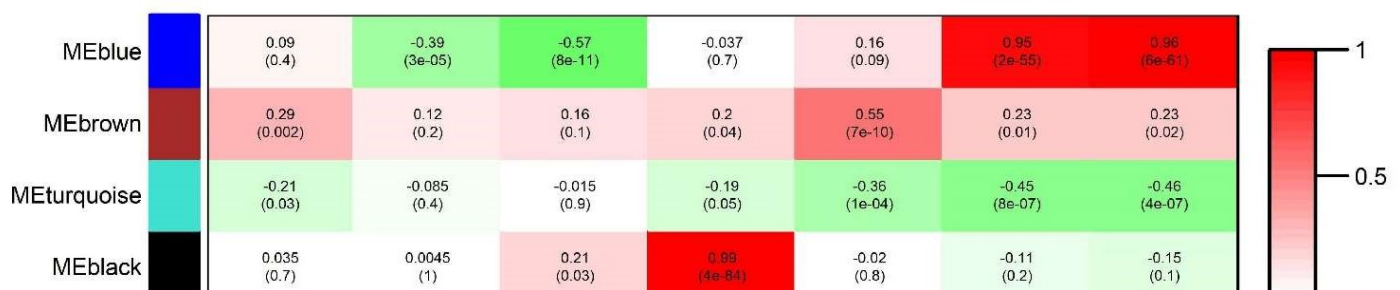

**Figure S1. Co-expression analyses using *post-mortem* ALS motor cortex tissue.** HML6.3p21.31c co-expresses with genes in the yellow network-module. This network-module significantly positively correlated with ALS disease status, in concordance with increased expression of HML6.3p21.31c in ALS compared to controls. The yellow network-module co-expresses with gene markers for multiple cell types and it is unlikely that this network is cell-type specific.

Co-expression network modules. Each network-module represents genes that co-express in *post-mortem* ALS motor cortex. *Y-Axis*: Network-module allocated colour. *X-axis*: Network-wide expression (eigen-network value) correlated with sample disease status and estimated brain cell count. *Box colours*: Red corresponds towards positive correlation, whereas green corresponds towards negative correlation, of network-modules with variable (on the *Y-Axis*). *Module values (within boxes)*: Pearson's  $r$  correlation value. P-value from Pearson's R analysis is in parentheses.

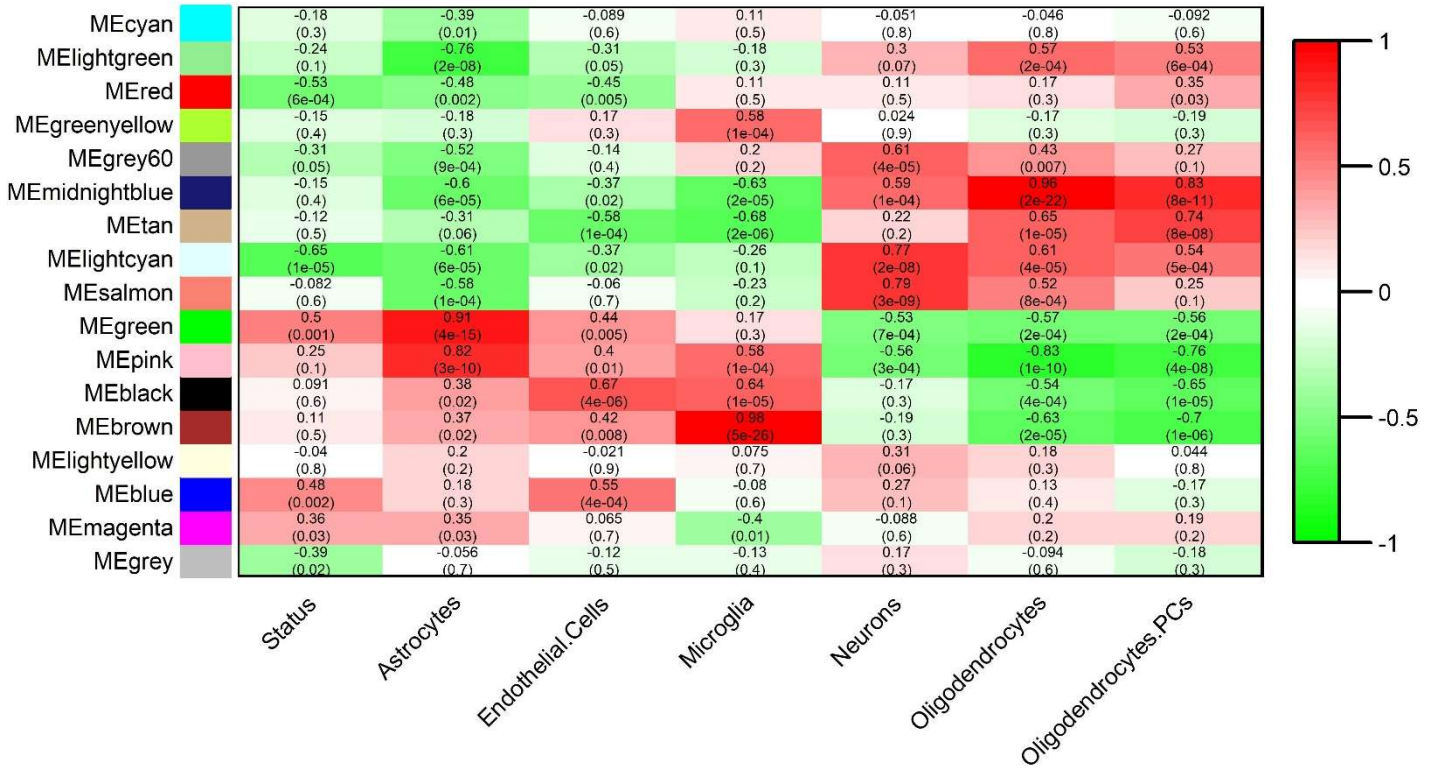

GO: Molecular Function

-Log(10) P-value

0 2 4 6 8

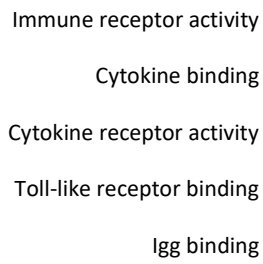

GO: Biological Process

-Log(10) P-value

0 10 20 30 40 50 60

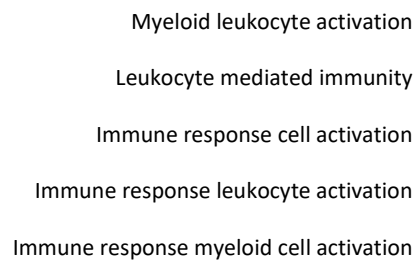

ClinVar

-Log(10) P-value

0 2 4 6 8 10 12

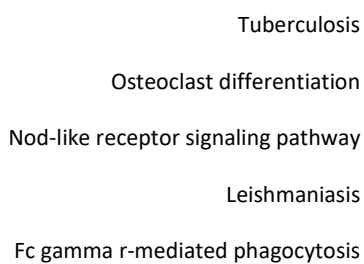

KEGG Pathway

-Log(10) P-value

0 1 2 3 4 5 6 7 8

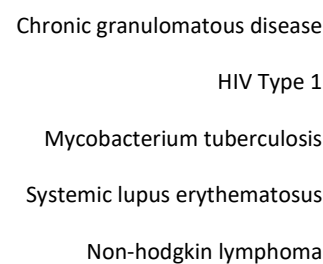

**Figure S2. Co-expression analyses using *post-mortem* ALS lateral motor cortex tissue.**

HML6.3p21.31c co-expresses with genes in the brown network-module.

**Top.** Co-expression network modules. Each network-module represents genes that co-express in *post-mortem* ALS motor cortex. *Y-Axis*: Network-module allocated colour. *X-axis*: Network-wide expression (eigen-network value) correlated with sample disease status and estimated brain cell count. *Box colours*: Red corresponds towards positive correlation, whereas green corresponds towards negative correlation, of network-modules with variable (on the *Y-Axis*). *Module values (within boxes)*: Pearson's r correlation value. P-value from Pearson's R analysis is in paratheses.

**Bottom.** Gene function enrichment analyses of brown network-module. This analysis identified significant enrichment of cytokine binding, as well as genes involved in HIV Type 1, similar to yellow module-network identified using *post-mortem* motor cortex from the GSE137810 lateral motor cortex dataset. *Upper X-axes*:  $-\log(10)$  P-value of the gene function enrichment analysis. *Y-axes*: Most significant gene function enrichment ontological categories. Bar-chart titles: Database used for gene function enrichment analyses.

| GENE SYMBOL | PEARSON'S R | P-VALUE |
|-------------|-------------|---------|
| TARDBP      | 0.210       | 0.041   |
| FUS         | 0.172       | 0.092   |
| UBQLN2      | 0.170       | 0.095   |
| GRN         | 0.150       | 0.140   |
| SCFD1       | 0.031       | 0.755   |
| PFN1        | 0.002       | 0.986   |
| C9ORF72     | -0.006      | 0.950   |
| TBK1        | -0.034      | 0.739   |
| NEK1        | -0.056      | 0.579   |
| ATXN2       | -0.077      | 0.445   |
| HNRNPA1     | -0.098      | 0.333   |
| SOD1        | -0.117      | 0.249   |
| UNC13A      | -0.196      | 0.056   |
| OPTN        | -0.253      | 0.014   |

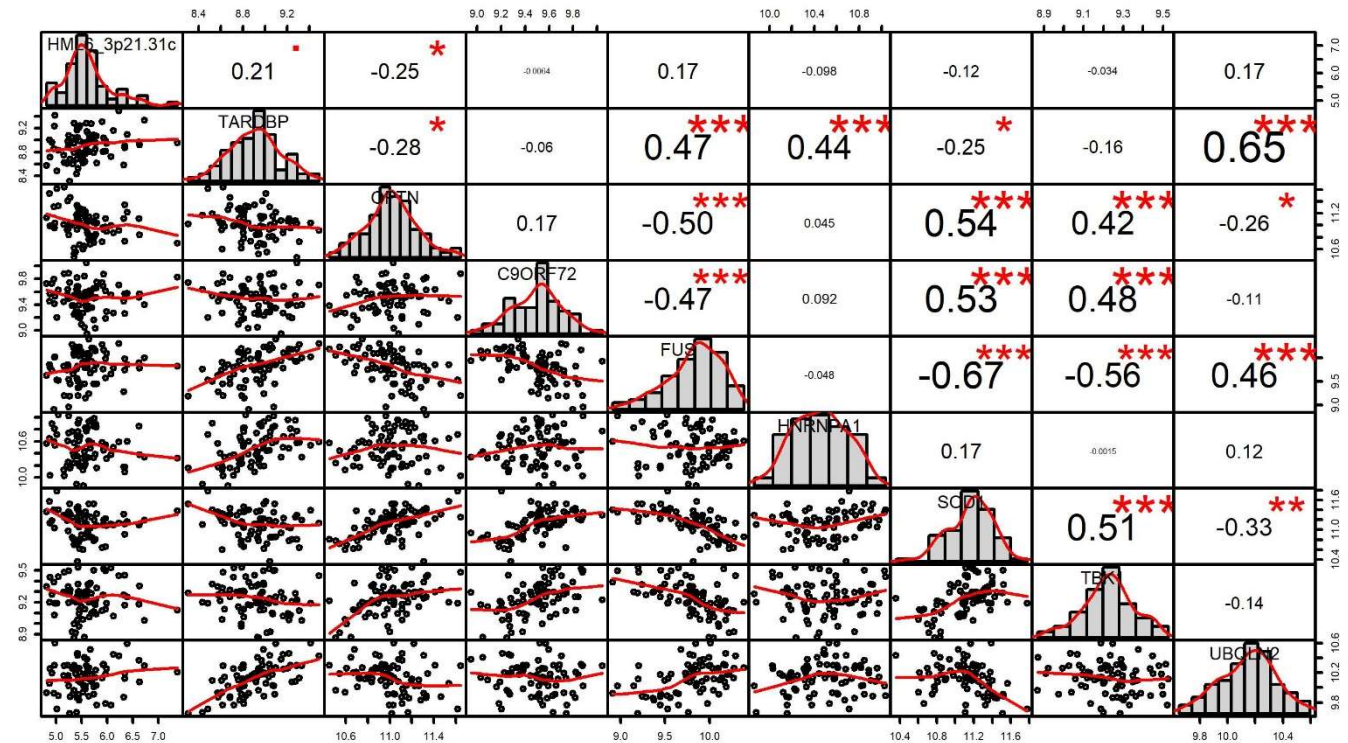

**Supplementary Fig S3. Pearson's r correlation of HML6\_3p21.31c expression with 14 ALS genes in ALS motor cortex.** HML6\_3p21.31c correlates with TARDBP, where  $r = 0.210$  and  $p\text{-value} = 0.041$ . **Left:** Table showing Pearson's r correlation of HML6\_3p21.31c expression with 14 ALS genes with corresponding p-value. **Right:** Matrix of expression correlations. **Lower-left:** Scatterplots of expression values across samples for ERVs and/or genes represented on X and Y axes. **Centre-Diagonal:** The distribution of HML6\_3p21.31c and ALS gene expression values over samples. **Upper-right:** Pearson's r correlation value of expression between genes, and gene and HML6\_3p21.31c, with statistical significance values represented as star. \*  $p < 0.05$ , \*\*  $p < 0.01$ , \*\*\*  $p < 0.001$ .

Supplementary Tables

| <i>Locus ID</i>    | Previous designations    | Chr. | Start     | End       | <i>Motor Cortex</i> |                            |                          | <i>Cerebellum</i>             |                             | <i>Frontal Cortex</i>  |                      |
|--------------------|--------------------------|------|-----------|-----------|---------------------|----------------------------|--------------------------|-------------------------------|-----------------------------|------------------------|----------------------|
|                    |                          |      |           |           | Log2 FC Primary KCL | Log2 FC Lateral GSE13781 0 | Log2 FC Medial GSE137810 | Log2 FC Cerebellum GSE13781 0 | Log2 FC Cerebellum GSE67196 | Log2 FC FCx GSE13781 0 | Log2 FC PFC GSE67196 |
| <i>HML2_3q12.2</i> | HERV-K(I); chr3q21.2_K-4 | 3    | 125890457 | 125899596 | -0.05 (0.54)        | 0.20 (0.15)                | 0.20 (0.16)              | -0.06 (0.75)                  | 0.91 (0.05)                 | 0.05 (0.70)            | 0.28 (0.41)          |
| <i>HML2_7q34</i>   | c7_C; chr7q34_K-15       | 7    | 141751124 | 141756138 | -0.05 (0.52)        | -0.04 (0.61)               | -0.20 (0.11)             | 0.21 (0.07)                   | 0.10 (0.68)                 | 0.10 (0.28)            | 0.08 (0.75)          |
| <i>HML2_8p23.1</i> | HERV-k115                | 8    | 7497023   | 7507805   | -0.24 (0.15)        | -0.33 (0.15)               | 0.35 (0.31)              | -0.03 (0.92)                  | -0.36 (0.54)                | -0.35 (0.11)           | 0.05 (0.89)          |
| <i>HML2_10p14</i>  | c10_A; chr10p14_K-16     | 10   | 6824177   | 6833641   | 0.06 (0.68)         | 0.03 (0.89)                | 0.22 (0.32)              | 0.23 (0.35)                   | -0.51 (0.35)                | -0.01 (0.96)           | -0.42 (0.23)         |
| <i>HML2_19p12</i>  | HERV-k113                | 19   | 21880627  | 21890401  | -0.26 (0.12)        | -0.30 (0.20)               | -0.14 (0.65)             | 0.11 (0.69)                   | 0.95 (0.11)                 | -0.10 (0.65)           | 0.57 (0.18)          |

**Supplementary Table S1.** Differential expression analysis of ERV loci previously studied in ALS. Values for Motor Cortex, Cerebellum, and Frontal Cortex are -log2 Fold-Change with p-value with parentheses from the differential expression analyses. Previous designations: Refers to previous loci IDs used in Li et al. 2015 and Mayer et al. 2018. Chr.: Chromosome, FC: Fold-Change, KCL: King's College London, FCx: Frontal Cortex, PFC: Prefrontal cortex



| ERVMap ID | Family         | Chr | Base Position Start | Base Position End | Log2 FC Primary KCL | Log2 FC Lateral GSE137810 | Log2 FC Medial GSE137810 | P-value Primary KCL | P-value Lateral GSE137810 | P-value Medial GSE137810 | Stouffer's Meta-analysis Z | Stouffer's Meta-analysis P |
|-----------|----------------|-----|---------------------|-------------------|---------------------|---------------------------|--------------------------|---------------------|---------------------------|--------------------------|----------------------------|----------------------------|
| 943       | HML6           | 3   | 46426676            | 46433564          | 0.691               | 0.642                     | 0.645                    | 2.29E-05            | 0.004                     | 0.0479                   | 5.413                      | 6.18E-08                   |
| 849       | HERVE          | 3   | 848018              | 853278            | -0.436              | -0.311                    | -0.74                    | 0.001               | 0.153                     | 0.0043                   | -4.335                     | 1.46E-05                   |
| 1351      | HERV9          | 4   | 27974870            | 27981380          | -0.295              | -0.835                    | -0.967                   | 0.079               | 2.89E-04                  | 0.0025                   | -3.915                     | 9.05E-05                   |
| 3682      | HERVL          | 12  | 5820733             | 5826818           | 0.343               | 0.427                     | 0.75                     | 0.014               | 0.054                     | 0.0027                   | 3.893                      | 9.89E-05                   |
| 654       | MER50          | 2   | 115116051           | 115124440         | 0.102               | 0.235                     | 0.74                     | 0.221               | 0.052                     | 3.72E-06                 | 3.417                      | 6.33E-04                   |
| 1782      | Unclassifiable | 5   | 24296854            | 24314450          | 0.424               | 0.393                     | 0.342                    | 0.009               | 0.074                     | 0.2854                   | 3.276                      | 1.05E-03                   |
| 4758      | HML6           | 19  | 51976954            | 51992228          | 0.154               | 0.297                     | 0.104                    | 0.037               | 0.003                     | 0.3927                   | 3.194                      | 0.001                      |
| 2251      | HERV9          | 6   | 86671994            | 86681327          | 0.188               | 0.354                     | 1.023                    | 0.201               | 0.076                     | 9.77E-05                 | 3.139                      | 0.002                      |
| 4438      | HML3           | 17  | 31631005            | 31637132          | 0.195               | 0.689                     | 0.981                    | 0.241               | 0.004                     | 0.0032                   | 3.127                      | 0.002                      |
| 2731      | HERVE          | 8   | 11931841            | 11936717          | -0.382              | -0.126                    | -0.541                   | 0.009               | 0.579                     | 0.0578                   | -3.113                     | 0.002                      |
| 3409      | HUERSP3        | 11  | 17370179            | 17379293          | -0.198              | -0.157                    | -0.063                   | 0.010               | 0.073                     | 0.5320                   | -3.092                     | 0.002                      |
| 4491      | MER41          | 18  | 405895              | 418808            | 0.232               | 0.562                     | 0.404                    | 0.068               | 0.011                     | 0.1490                   | 3.008                      | 0.003                      |
| 3078      | HERV9          | 9   | 78431299            | 78443032          | 0.396               | -0.228                    | 0.367                    | 0.001               | 0.281                     | 0.1106                   | 2.989                      | 0.003                      |
| 2839      | HML1           | 8   | 60493460            | 60499925          | 0.257               | 0.298                     | 0.317                    | 0.031               | 0.094                     | 0.1831                   | 2.940                      | 0.003                      |
| 500       | MER41          | 2   | 33051995            | 33055372          | -0.173              | -0.566                    | -0.822                   | 0.277               | 0.015                     | 0.0023                   | -2.916                     | 0.004                      |
| 2636      | HERVT          | 7   | 134548503           | 134558366         | 0.303               | 0.275                     | 0.68                     | 0.052               | 0.233                     | 0.0240                   | 2.914                      | 0.004                      |
| 6171      | HML2           | 1   | 207632284           | 207641252         | 0.241               | 0.281                     | 1.055                    | 0.144               | 0.233                     | 0.0012                   | 2.853                      | 0.004                      |
| 967       | HERVH          | 3   | 58585013            | 58595736          | 0.345               | 0.257                     | 0.184                    | 0.018               | 0.178                     | 0.3894                   | 2.832                      | 0.005                      |
| 2077      | HERVW          | 6   | 13881106            | 13887724          | 0.279               | 0.813                     | 0.095                    | 0.091               | 5.69E-04                  | 0.7775                   | 2.816                      | 0.005                      |
| W-11      | NA             | 2   | 164657909           | 164659611         | 0.197               | 0.292                     | 0.811                    | 0.177               | 0.128                     | 0.0027                   | 2.791                      | 0.005                      |
| 3533      | HERV3          | 11  | 68867422            | 68874590          | -0.193              | -0.243                    | -0.396                   | 0.097               | 0.090                     | 0.0380                   | -2.786                     | 0.005                      |
| 3436      | HUERSP3        | 11  | 34897253            | 34907021          | 0.176               | 0.353                     | 0.482                    | 0.146               | 0.058                     | 0.0213                   | 2.764                      | 0.006                      |
| W-27      | NA             | 4   | 138621785           | 138627199         | 0.299               | 0.42                      | 0.37                     | 0.060               | 0.056                     | 0.2084                   | 2.763                      | 0.006                      |
| ERVV-1    | NA             | 19  | 53014330            | 53016580          | -0.422              | -0.028                    | -0.514                   | 0.012               | 0.905                     | 0.1245                   | -2.755                     | 0.006                      |
| 1439      | MER41          | 4   | 67450492            | 67463204          | 0.144               | 0.263                     | 0.17                     | 0.078               | 0.037                     | 0.1920                   | 2.745                      | 0.006                      |
| 944       | HERVS          | 3   | 46417555            | 46423902          | 0.273               | 0.779                     | 0.102                    | 0.101               | 9.16E-04                  | 0.7506                   | 2.736                      | 0.006                      |
| 3825      | HERVL          | 12  | 64130613            | 64136206          | 0.284               | 0.143                     | 0.24                     | 0.021               | 0.421                     | 0.2158                   | 2.718                      | 0.007                      |
| 1412      | HERV4          | 4   | 55938234            | 55948225          | 0.387               | 0.065                     | 0.547                    | 0.022               | 0.780                     | 0.0942                   | 2.673                      | 0.008                      |
| 4615      | HERVIP         | 19  | 9709655             | 9722342           | 0.222               | 0.259                     | 0.745                    | 0.160               | 0.193                     | 0.0064                   | 2.657                      | 0.008                      |
| 4790      | Unclassifiable | 19  | 57487176            | 57500813          | -0.085              | -0.177                    | -0.21                    | 0.134               | 0.056                     | 0.0676                   | -2.639                     | 0.008                      |
| 4818      | HARLEQUIN      | 20  | 15980069            | 15986191          | 0.332               | 0.476                     | -0.011                   | 0.036               | 0.021                     | 0.9710                   | 2.634                      | 0.008                      |

|      |       |   |           |           |        |        |        |       |       |        |        |       |
|------|-------|---|-----------|-----------|--------|--------|--------|-------|-------|--------|--------|-------|
| 6238 | HML5  | 1 | 242212992 | 242217888 | -0.101 | -0.483 | -0.517 | 0.318 | 0.011 | 0.0178 | -2.633 | 0.008 |
| 1908 | HERVH | 5 | 96164809  | 96172177  | 0.175  | 0.329  | 0.57   | 0.232 | 0.052 | 0.0132 | 2.625  | 0.009 |
| 5346 | HERVH | X | 37451927  | 37461065  | 0.193  | 0.056  | 0.51   | 0.071 | 0.723 | 0.0100 | 2.599  | 0.009 |

**Supplementary Table S2a.** Differential expression analysis of transcripts in **motor cortex**, with Log2 Fold-Change, P-value from differential expression analyses and Stouffer's meta-analysis. Only transcripts with Stouffer's method p-value < 0.01. For this table, ERVMap identifiers are used. Chr: Chromosome, KCL: King's College London, MC: Motor Cortex, FC: Fold-change

| ERVMap ID | Family | Chr | Base Position Start | Base Position End | Log2 FC Cerebellum GSE137810 | Log2 FC Cerebellum GSE67196 | P-value Cerebellum GSE137810 | P-value Cerebellum GSE67196 | Stouffer's Meta-analysis Z | Stouffer's Meta-analysis P |
|-----------|--------|-----|---------------------|-------------------|------------------------------|-----------------------------|------------------------------|-----------------------------|----------------------------|----------------------------|
| 4213      | HERVH  | 14  | 92041754            | 92049863          | 0.657                        | 0.618                       | 2.87E-08                     | 0.076                       | 5.824                      | 5.76E-09                   |
| 2152      | HML5   | 6   | 57069286            | 57080996          | 0.545                        | 1.031                       | 1.43E-06                     | 1.22E-04                    | 5.813                      | 6.13E-09                   |
| 5909      | HERVH  | 1   | 65637767            | 65648036          | 0.926                        | 0.624                       | 3.54E-07                     | 0.054                       | 5.443                      | 5.23E-08                   |
| 921       | HERVH  | 3   | 37205387            | 37210420          | 0.866                        | 1.002                       | 2.05E-06                     | 0.025                       | 5.221                      | 1.78E-07                   |
| 4180      | LTR19  | 14  | 70536592            | 70544307          | 0.558                        | 0.784                       | 2.08E-06                     | 0.045                       | 5.141                      | 2.73E-07                   |
| 2519      | HERVFC | 7   | 64834894            | 64840158          | 0.431                        | 0.874                       | 1.58E-04                     | 0.010                       | 4.409                      | 1.04E-05                   |
| 4763      | HML6   | 19  | 52408080            | 52414733          | 0.313                        | 0.781                       | 2.32E-04                     | 0.006                       | 4.379                      | 1.19E-05                   |
| 4279      | HERVW  | 15  | 55304849            | 55312434          | 0.57                         | 0.543                       | 5.42E-05                     | 0.103                       | 4.347                      | 1.38E-05                   |
| 4617      | HML6   | 19  | 11853296            | 11860978          | 0.385                        | 0.898                       | 2.09E-04                     | 0.012                       | 4.322                      | 1.55E-05                   |
| 6228      | HERVIP | 1   | 235670260           | 235675550         | 0.4                          | 1.284                       | 2.23E-04                     | 0.012                       | 4.309                      | 1.64E-05                   |
| 1439      | MER41  | 4   | 67450492            | 67463204          | 0.433                        | 0.847                       | 1.59E-04                     | 0.024                       | 4.308                      | 1.65E-05                   |
| 4678      | HERVH  | 19  | 23340354            | 23353938          | 0.266                        | 1.076                       | 9.19E-04                     | 4.60E-04                    | 4.279                      | 1.88E-05                   |
| 1080      | LTR19  | 3   | 119978069           | 119990309         | 0.418                        | 0.027                       | 8.95E-06                     | 0.960                       | 4.212                      | 2.53E-05                   |
| 536       | HERVW  | 2   | 53755318            | 53760155          | 0.393                        | 0.81                        | 1.00E-04                     | 0.110                       | 4.198                      | 2.70E-05                   |
| ERVW-26   | NA     | 14  | 45019484            | 45023694          | 0.412                        | 1.273                       | 2.68E-04                     | 0.030                       | 4.156                      | 3.23E-05                   |
| 2518      | HERVH  | 7   | 64679994            | 64686561          | 0.553                        | 1.419                       | 4.42E-04                     | 0.015                       | 4.118                      | 3.83E-05                   |
| 1250      | HERVW  | 3   | 179055106           | 179062330         | 0.627                        | 0.498                       | 4.89E-05                     | 0.422                       | 4.100                      | 4.13E-05                   |
| 2829      | MER41  | 8   | 54070287            | 54074793          | 0.46                         | 0.459                       | 1.03E-04                     | 0.379                       | 3.957                      | 7.60E-05                   |
| 5429      | LTR46  | X   | 63426517            | 63434693          | 0.381                        | 0.55                        | 9.59E-04                     | 0.026                       | 3.851                      | 1.17E-04                   |
| 4830      | HERVE  | 20  | 24919441            | 24933027          | -0.968                       | 0.065                       | 4.31E-05                     | 0.922                       | -3.833                     | 1.27E-04                   |
| 6062      | HML2   | 1   | 150628158           | 150635776         | 0.383                        | 0.143                       | 1.28E-04                     | 0.539                       | 3.820                      | 1.33E-04                   |
| ERV3-1    | NA     | 7   | 64990354            | 65006746          | 0.387                        | 0.449                       | 3.70E-04                     | 0.185                       | 3.799                      | 1.45E-04                   |
| 4533      | HERVH  | 18  | 31803769            | 31810043          | 1.022                        | 0.54                        | 1.91E-04                     | 0.437                       | 3.780                      | 1.57E-04                   |
| ERVW-17   | NA     | 6   | 106228135           | 106235814         | 0.38                         | 1.752                       | 0.002                        | 0.007                       | 3.770                      | 1.63E-04                   |
| 4259      | HERVH  | 15  | 42884919            | 42890353          | 0.489                        | 1.167                       | 8.99E-04                     | 0.053                       | 3.770                      | 1.63E-04                   |
| 4309      | HML3   | 15  | 89232354            | 89239939          | -0.94                        | 0.626                       | 1.46E-05                     | 0.305                       | -3.759                     | 1.70E-04                   |
| 1073      | HERVW  | 3   | 115742107           | 115757987         | -0.974                       | -0.718                      | 3.51E-04                     | 0.297                       | -3.719                     | 2.00E-04                   |

|      |           |    |           |           |       |       |          |          |       |          |
|------|-----------|----|-----------|-----------|-------|-------|----------|----------|-------|----------|
| 1712 | HARLEQUIN | 4  | 173098722 | 173106034 | 0.617 | 2.192 | 0.005    | 0.002    | 3.714 | 2.04E-04 |
| 3866 | HML5      | 12 | 88173234  | 88183818  | 0.326 | 0.909 | 0.002    | 0.032    | 3.698 | 2.17E-04 |
| 4361 | HERVFB    | 16 | 30541068  | 30546762  | 0.721 | 0.834 | 0.001    | 0.073    | 3.637 | 2.76E-04 |
| 2653 | HERVH     | 7  | 141575646 | 141584446 | 0.557 | 1.02  | 0.001    | 0.079    | 3.589 | 3.32E-04 |
| 3367 | HERV9     | 10 | 119883734 | 119890745 | 0.409 | 2.224 | 0.016    | 1.29E-04 | 3.525 | 4.23E-04 |
| 750  | HUERSP2   | 2  | 174202251 | 174216415 | 0.302 | 1.117 | 0.004    | 0.019    | 3.484 | 4.94E-04 |
| 2095 | HERVW     | 6  | 24667710  | 24680423  | 0.401 | 0.594 | 0.002    | 0.157    | 3.418 | 6.32E-04 |
| 3943 | HERVH     | 13 | 36316324  | 36321264  | 0.421 | 1.11  | 0.004    | 0.030    | 3.399 | 6.77E-04 |
| 4849 | HERVIP    | 20 | 49281127  | 49287343  | 0.349 | 0.756 | 0.004    | 0.039    | 3.374 | 7.41E-04 |
| 5918 | HERVH     | 1  | 70366861  | 70372373  | 0.572 | 0.07  | 5.05E-04 | 0.836    | 3.354 | 7.96E-04 |
| 1281 | HERVIP    | 3  | 197242999 | 197248821 | 0.449 | 0.622 | 0.001    | 0.306    | 3.352 | 8.01E-04 |
| 5477 | HML5      | X  | 73655974  | 73666201  | 0.319 | 1.536 | 0.010    | 0.006    | 3.338 | 8.45E-04 |
| 2776 | HERVE     | 8  | 41590932  | 41598326  | 0.305 | 0.769 | 0.005    | 0.039    | 3.336 | 8.49E-04 |
| 4097 | HERVIP    | 14 | 30965848  | 30972548  | 0.356 | 0.787 | 0.003    | 0.114    | 3.328 | 8.74E-04 |
| 2673 | HERVH     | 7  | 150307239 | 150313286 | 0.806 | 0.902 | 0.002    | 0.191    | 3.324 | 8.88E-04 |

**Supplementary Table S2b.** Differential expression analysis of transcripts in **cerebellum**, with Log2 Fold-Change, P-value from differential expression analyses and Stouffer's meta-analysis. Only transcripts with Stouffer's method p-value < 0.0001. For this table, ERVMap identifiers are used. Chr: Chromosome, FC: Fold-Change

| ERVMap ID | Family    | Chr | Base Position Start | Base Position End | Log2 FC FCx GSE137810 | Log2 FC PFC GSE67196 | P-value FCx GSE137810 | P-value PFC GSE67196 | Stouffer's Meta-analysis Z | Stouffer's Meta-analysis P |
|-----------|-----------|-----|---------------------|-------------------|-----------------------|----------------------|-----------------------|----------------------|----------------------------|----------------------------|
| 4410      | HERVIP    | 16  | 72064268            | 72073376          | -0.871                | 0.147                | 4.70E-06              | 0.683                | -4.137                     | 3.52E-05                   |
| 2716      | HERVE     | 8   | 8033824             | 8046265           | -0.91                 | 0.345                | 3.21E-06              | 0.369                | -4.037                     | 5.41E-05                   |
| 5872      | HERVH     | 1   | 45316433            | 45321282          | -0.669                | -0.05                | 6.00E-05              | 0.903                | -3.796                     | 1.47E-04                   |
| 4258      | HERVIP    | 15  | 41587553            | 41592735          | -0.79                 | 0.099                | 1.29E-04              | 0.727                | -3.457                     | 5.45E-04                   |
| 6262      | HERVH     | 22  | 16611311            | 16616782          | 0.501                 | 0.584                | 0.003                 | 0.061                | 3.441                      | 5.79E-04                   |
| 3301      | HML1      | 10  | 80104700            | 80116174          | -0.734                | -0.408               | 0.001                 | 0.299                | -3.409                     | 6.52E-04                   |
| 3245      | HERVH     | 10  | 45571381            | 45577314          | 0.477                 | 0.355                | 9.92E-04              | 0.382                | 3.389                      | 7.02E-04                   |
| 2766      | HERV1     | 8   | 38081998            | 38091940          | -0.498                | 0.025                | 3.63E-04              | 0.952                | -3.314                     | 9.21E-04                   |
| 3433      | HERVFB    | 11  | 31608174            | 31609536          | 0.734                 | 0.027                | 7.13E-04              | 0.908                | 3.206                      | 0.001                      |
| 744       | HERVH     | 2   | 169129439           | 169137549         | 0.701                 | 0.293                | 0.002                 | 0.483                | 3.199                      | 0.001                      |
| 5814      | HERVFB    | 1   | 6560513             | 6570438           | -0.734                | -0.021               | 8.10E-04              | 0.952                | -3.154                     | 0.002                      |
| 4666      | HARLEQUIN | 19  | 22355407            | 22362466          | -0.723                | 0.069                | 5.85E-04              | 0.831                | -3.141                     | 0.002                      |
| 4271      | HERV9     | 15  | 51357586            | 51367580          | 0.495                 | 0.556                | 0.005                 | 0.160                | 3.138                      | 0.002                      |
| 4215      | HERVIP    | 14  | 92622416            | 92629608          | -0.631                | 0.053                | 6.45E-04              | 0.874                | -3.135                     | 0.002                      |
| 5840      | HERVE     | 1   | 20153945            | 20160366          | -0.787                | 0.188                | 3.48E-04              | 0.533                | -3.124                     | 0.002                      |
| 4761      | HML6      | 19  | 52472460            | 52485485          | -0.439                | -0.447               | 0.003                 | 0.283                | -3.123                     | 0.002                      |
| 4862      | HERV1     | 21  | 14115153            | 14124623          | -0.597                | -0.429               | 0.003                 | 0.302                | -3.109                     | 0.002                      |
| 3586      | HERVH     | 11  | 89381303            | 89387559          | 0.7                   | -0.044               | 7.33E-04              | 0.874                | 3.102                      | 0.002                      |
| 559       | HERVE     | 2   | 64886311            | 64899831          | -0.692                | 0.066                | 7.28E-04              | 0.867                | -3.101                     | 0.002                      |
| 2984      | HML4      | 8   | 145055668           | 145066696         | -0.236                | -0.392               | 0.024                 | 0.006                | -3.081                     | 0.002                      |
| 1412      | HERV4     | 4   | 55938234            | 55948225          | 0.615                 | 0.581                | 0.006                 | 0.163                | 3.048                      | 0.002                      |
| 1104      | HML3      | 3   | 126093176           | 126102115         | -0.56                 | -0.094               | 0.002                 | 0.808                | -2.966                     | 0.003                      |
| 2636      | HERVT     | 7   | 134548503           | 134558366         | -0.556                | -0.626               | 0.009                 | 0.131                | -2.962                     | 0.003                      |
| 6094      | HERV9     | 1   | 169661627           | 169670891         | -0.68                 | -0.021               | 0.002                 | 0.928                | -2.952                     | 0.003                      |
| K-64      | NA        | X   | 154608421           | 154615762         | -0.685                | 0.006                | 0.002                 | 0.978                | -2.932                     | 0.003                      |
| 2621      | HERVH     | 7   | 124957310           | 124967789         | 0.454                 | 0.38                 | 0.006                 | 0.284                | 2.931                      | 0.003                      |
| 4511      | MER57     | 18  | 13700698            | 13707821          | 0.399                 | 0.146                | 0.004                 | 0.666                | 2.860                      | 0.004                      |

|       |           |    |           |           |        |        |          |          |        |       |
|-------|-----------|----|-----------|-----------|--------|--------|----------|----------|--------|-------|
| 2946  | HERVH     | 8  | 119873658 | 119878636 | 0.371  | 0.523  | 0.017    | 0.080    | 2.859  | 0.004 |
| 5657  | HARLEQUIN | X  | 115537907 | 115545511 | 0.46   | 0.404  | 0.011    | 0.243    | 2.790  | 0.005 |
| 1303  | HML2      | 4  | 9121944   | 9131359   | -0.396 | -0.172 | 0.006    | 0.604    | -2.775 | 0.006 |
| 4523  | HERVH     | 18 | 28208151  | 28214533  | -0.617 | 0.148  | 0.002    | 0.592    | -2.774 | 0.006 |
| 1302  | HERVE     | 4  | 9094449   | 9108450   | -0.509 | 0.418  | 6.96E-04 | 0.253    | -2.767 | 0.006 |
| 3513  | HERVE     | 11 | 61093577  | 61099813  | -0.698 | 0.105  | 0.002    | 0.650    | -2.758 | 0.006 |
| 2090  | HERVL     | 6  | 19399478  | 19406918  | -0.616 | -0.001 | 0.003    | 0.997    | -2.753 | 0.006 |
| 3395  | MER66     | 11 | 6747291   | 6754907   | 0.313  | 0.789  | 0.039    | 0.021    | 2.743  | 0.006 |
| 4613  | HERVH     | 19 | 9741761   | 9751748   | 0.251  | 0.073  | 0.006    | 0.606    | 2.737  | 0.006 |
| 4189  | HERVL     | 14 | 80224809  | 80231256  | -0.575 | 0.024  | 0.003    | 0.918    | -2.729 | 0.006 |
| 4894  | HERVIP    | 21 | 36104267  | 36109979  | 0.256  | 1.074  | 0.153    | 9.04E-05 | 2.722  | 0.006 |
| 4361  | HERVFB    | 16 | 30541068  | 30546762  | 0.344  | 1.115  | 0.062    | 0.006    | 2.708  | 0.007 |
| 4804  | HML6      | 20 | 1396937   | 1407244   | -0.682 | 0.151  | 0.002    | 0.667    | -2.681 | 0.007 |
| 4506  | HERVL     | 18 | 11130174  | 11134262  | 0.602  | -0.003 | 0.005    | 0.989    | 2.645  | 0.008 |
| 2727  | HML5      | 8  | 9799846   | 9814148   | -0.581 | -0.146 | 0.010    | 0.527    | -2.634 | 0.008 |
| W-132 | NA        | 14 | 58122279  | 58126144  | 0.327  | 0.601  | 0.024    | 0.146    | 2.627  | 0.009 |
| 686   | HERVIP    | 2  | 132139786 | 132147993 | 0.443  | 0.388  | 0.017    | 0.262    | 2.624  | 0.009 |
| 3226  | HERVT     | 10 | 37937011  | 37944189  | -0.425 | 0.365  | 0.002    | 0.383    | -2.596 | 0.009 |

**Supplementary Table S2c.** Differential expression analysis of transcripts in **frontal cortex**, with Log2 Fold-Change, P-value from differential expression analyses and Stouffer's meta-analysis. Only transcripts with Stouffer's method p-value < 0.0001. For this table, ERVMap identifiers are used. Chr: Chromosome, FCx: Frontal Cortex, PFC: Prefrontal Cortex, FC: Fold-change

| ERV Family | Log2 FC Primary KCL | Log2 FC Lateral GSE13781 0 | Log2 FC Medial GSE13781 0 | P-value Primary KCL | P-value Lateral GSE13781 0 | P-value Medial GSE13781 0 | Stouffer's Meta-analysis Z | Stouffer's Meta-analysis P | MAGMA Beta | MAGMA P-value |
|------------|---------------------|----------------------------|---------------------------|---------------------|----------------------------|---------------------------|----------------------------|----------------------------|------------|---------------|
| HERV3      | 0.116               | 0.103                      | 0.028                     | 0.017               | 0.250                      | 0.837                     | 2.547                      | 0.011                      | -0.177     | 0.897         |
| HERVE      | -0.090              | -0.024                     | -0.121                    | 0.042               | 0.816                      | 0.469                     | -1.812                     | 0.070                      | -0.062     | 0.749         |
| HML5       | 0.073               | -0.005                     | -0.037                    | 0.072               | 0.960                      | 0.771                     | 1.469                      | 0.142                      | 0.065      | 0.274         |
| HERVFRD    | -0.188              | 0.126                      | -0.165                    | 0.080               | 0.194                      | 0.158                     | -1.424                     | 0.154                      | 0.510      | 0.041         |
| HERV9      | 0.033               | 0.130                      | -0.074                    | 0.228               | 0.165                      | 0.570                     | 1.167                      | 0.243                      | 0.073      | 0.142         |
| MER61      | 0.737               | 0.169                      | 0.041                     | 0.515               | 0.064                      | 0.631                     | 1.072                      | 0.284                      | 1.077      | 0.014         |
| HML4       | -0.007              | -0.087                     | -0.111                    | 0.931               | 0.536                      | 0.391                     | -1.059                     | 0.289                      | -0.324     | 0.852         |
| HML2       | 0.060               | -0.001                     | -0.198                    | 0.190               | 0.996                      | 0.155                     | -0.978                     | 0.328                      | -0.193     | 0.907         |
| HERVL      | 0.042               | 0.108                      | -0.083                    | 0.194               | 0.256                      | 0.547                     | 0.896                      | 0.370                      | 0.000      | 0.499         |
| PALB       | -0.150              | 0.139                      | -0.048                    | 0.028               | 0.220                      | 0.744                     | -0.833                     | 0.405                      | -0.021     | 0.525         |
| HML1       | -0.081              | 0.066                      | -0.113                    | 0.395               | 0.689                      | 0.465                     | -0.814                     | 0.416                      | 0.120      | 0.216         |
| HERVW      | 0.014               | 0.051                      | -0.133                    | 0.617               | 0.586                      | 0.272                     | -0.777                     | 0.437                      | 0.073      | 0.267         |
| HERVI      | 0.055               | 0.039                      | -0.123                    | 0.540               | 0.719                      | 0.330                     | -0.509                     | 0.611                      | -0.062     | 0.592         |
| HERVH      | -0.109              | 0.089                      | 0.124                     | 0.064               | 0.423                      | 0.422                     | -0.168                     | 0.867                      | -0.052     | 0.911         |
| HERVH48    | -0.051              | 0.039                      | 0.075                     | 0.376               | 0.725                      | 0.601                     | 0.080                      | 0.937                      | 0.196      | 0.186         |
| HML6       | 0.075               | 0.033                      | -0.120                    | 0.153               | 0.712                      | 0.286                     | -0.064                     | 0.949                      | 0.199      | 0.087         |
| HML3       | -0.002              | 0.054                      | -0.069                    | 0.960               | 0.584                      | 0.618                     | -0.057                     | 0.955                      | 0.113      | 0.072         |

**Supplementary Table S3a.** Differential expression analysis of ERV families using TETranscripts in **motor cortex**, with Log2 Fold-Change, P-value from differential expression analyses, Stouffer's meta-analysis and MAGMA ERV-set analysis using ALS GWAS. Chr: Chromosome, KCL: King's College London, FC: Fold-change

| ERV Family     | Log2 FC<br>Cerebellum<br>GSE137810 | Log2 FC<br>Cerebellum<br>GSE67196 | P-value<br>Cerebellum<br>GSE137810 | P-value<br>Cerebellum<br>GSE67196 | Stouffer's<br>Meta-analysis<br>Z | Stouffer's<br>Meta-analysis<br>P | MAGMA<br>Beta | MAGMA P-<br>value |
|----------------|------------------------------------|-----------------------------------|------------------------------------|-----------------------------------|----------------------------------|----------------------------------|---------------|-------------------|
| <b>HERVH48</b> | 0.309                              | 0.593                             | 0.009                              | 0.017                             | 3.326                            | 0.001                            | 0.196         | 0.186             |
| <b>HML5</b>    | 0.061                              | 0.584                             | 0.569                              | 0.002                             | 3.126                            | 0.002                            | 0.065         | 0.274             |
| <b>PALB</b>    | 0.038                              | 0.613                             | 0.719                              | 0.011                             | 2.570                            | 0.010                            | -0.021        | 0.525             |
| <b>HERVI</b>   | 0.138                              | 0.461                             | 0.158                              | 0.024                             | 2.568                            | 0.010                            | -0.062        | 0.592             |
| <b>HERVW</b>   | 0.074                              | 0.505                             | 0.500                              | 0.015                             | 2.501                            | 0.012                            | 0.073         | 0.267             |
| <b>HERV9</b>   | -0.010                             | 0.409                             | 0.930                              | 0.012                             | 2.499                            | 0.012                            | 0.073         | 0.142             |
| <b>HERVH</b>   | 0.251                              | 0.285                             | 0.029                              | 0.216                             | 2.372                            | 0.018                            | -0.052        | 0.911             |
| <b>HERVFRD</b> | -0.064                             | 0.474                             | 0.562                              | 0.029                             | 2.086                            | 0.037                            | 0.510         | 0.041             |
| <b>HML3</b>    | -0.174                             | 0.377                             | 0.169                              | 0.010                             | 1.767                            | 0.077                            | 0.113         | 0.072             |
| <b>HERVE</b>   | -0.198                             | 0.499                             | 0.073                              | 0.010                             | 1.743                            | 0.081                            | -0.062        | 0.749             |
| <b>HERV3</b>   | -0.090                             | 0.308                             | 0.403                              | 0.061                             | 1.565                            | 0.117                            | -0.177        | 0.897             |
| <b>HERVL</b>   | -0.040                             | 0.210                             | 0.724                              | 0.139                             | 1.388                            | 0.165                            | 0.000         | 0.499             |
| <b>HML2</b>    | -0.159                             | -0.004                            | 0.263                              | 0.981                             | -1.120                           | 0.263                            | -0.193        | 0.907             |
| <b>HML6</b>    | -0.008                             | 0.165                             | 0.920                              | 0.263                             | 1.113                            | 0.266                            | 0.199         | 0.087             |
| <b>HML4</b>    | 0.105                              | 0.091                             | 0.438                              | 0.564                             | 0.963                            | 0.335                            | -0.324        | 0.852             |
| <b>MER61</b>   | -0.053                             | 0.151                             | 0.664                              | 0.374                             | 0.694                            | 0.487                            | 1.077         | 0.014             |
| <b>HML1</b>    | -0.002                             | 0.008                             | 0.985                              | 0.950                             | 0.056                            | 0.956                            | 0.120         | 0.216             |

**Supplementary Table S3b.** Differential expression analysis of ERV families using TETranscripts in **cerebellum**, with Log2 Fold-Change, P-value from differential expression analyses, Stouffer's meta-analysis and MAGMA ERV-set analysis using ALS GWAS. Chr: Chromosome, KCL: King's College London, MC: Motor Cortex, FC: Fold-change



| ERV Family | Log2 FC<br>FCx<br>GSE137810 | Log2 FC<br>PFC<br>GSE67196 | P-value<br>FCx<br>GSE137810 | P-value<br>PFC<br>GSE67196 | Stouffer's<br>Meta-analysis<br>Z | Stouffer's<br>Meta-analysis<br>P | MAGMA<br>Beta | MAGMA P-<br>value |
|------------|-----------------------------|----------------------------|-----------------------------|----------------------------|----------------------------------|----------------------------------|---------------|-------------------|
| HERVE      | -0.168                      | 0.473                      | 0.028                       | 0.003                      | 2.077                            | 0.038                            | -0.062        | 0.749             |
| PALB       | -0.169                      | -0.038                     | 0.042                       | 0.837                      | -2.032                           | 0.042                            | -0.021        | 0.525             |
| HML4       | 0.000                       | -0.198                     | 0.996                       | 0.051                      | -1.951                           | 0.051                            | -0.324        | 0.852             |
| HERVH      | 0.040                       | -0.214                     | 0.596                       | 0.053                      | -1.801                           | 0.072                            | -0.052        | 0.911             |
| HML5       | -0.050                      | 0.272                      | 0.424                       | 0.055                      | 1.745                            | 0.081                            | 0.065         | 0.274             |
| HERVI      | -0.073                      | -0.200                     | 0.258                       | 0.152                      | -1.735                           | 0.083                            | -0.062        | 0.592             |
| HML2       | -0.006                      | -0.288                     | 0.954                       | 0.089                      | -1.699                           | 0.089                            | -0.193        | 0.907             |
| HERV3      | -0.027                      | 0.249                      | 0.668                       | 0.119                      | 1.503                            | 0.133                            | -0.177        | 0.897             |
| HERVH48    | 0.000                       | 0.198                      | 0.995                       | 0.190                      | 1.312                            | 0.190                            | 0.196         | 0.186             |
| HML3       | -0.047                      | 0.172                      | 0.462                       | 0.129                      | 1.269                            | 0.204                            | 0.113         | 0.072             |
| HERV9      | -0.059                      | -0.087                     | 0.371                       | 0.405                      | -1.191                           | 0.234                            | 0.073         | 0.142             |
| HERVL      | -0.058                      | -0.057                     | 0.378                       | 0.688                      | -0.910                           | 0.363                            | 0.000         | 0.499             |
| HERVFRD    | -0.061                      | -0.051                     | 0.356                       | 0.770                      | -0.896                           | 0.370                            | 0.510         | 0.041             |
| HML6       | -0.047                      | -0.022                     | 0.405                       | 0.794                      | -0.863                           | 0.388                            | 0.199         | 0.087             |
| HERVW      | 0.016                       | -0.053                     | 0.797                       | 0.726                      | -0.262                           | 0.793                            | 0.073         | 0.267             |
| HML1       | 0.064                       | -0.082                     | 0.375                       | 0.548                      | 0.076                            | 0.939                            | 0.120         | 0.216             |
| MER61      | 0.050                       | -0.066                     | 0.407                       | 0.556                      | 0.027                            | 0.979                            | 1.077         | 0.014             |

**Supplementary Table S3c.** Differential expression analysis of ERV families using TET transcripts in **frontal cortex**, with Log2 Fold-Change, P-value from differential expression analyses, Stouffer's meta-analysis and MAGMA ERV-set analysis using ALS GWAS. Chr: Chromosome, KCL: King's College London, FC: Fold-Change, FCx: Frontal-cortex, PFC: Prefrontal cortex

| SOURCE | TERM                           | P-VALUE  | TERM SIZE (N GENES) | QUERY SIZE (N GENES) | OVERLAP SIZE (N GENES) | OVERLAPPING GENES                                                                                                                                                                                                                                                                                                                                                                                                                                                                                                                                                                                                                                                                                              |
|--------|--------------------------------|----------|---------------------|----------------------|------------------------|----------------------------------------------------------------------------------------------------------------------------------------------------------------------------------------------------------------------------------------------------------------------------------------------------------------------------------------------------------------------------------------------------------------------------------------------------------------------------------------------------------------------------------------------------------------------------------------------------------------------------------------------------------------------------------------------------------------|
| GO:MF  | Cytokine binding               | 3.96E-07 | 131                 | 624                  | 22                     | TNFRSF1A, IL1R1, OSMR, CD93, TNFRSF1B, IL6R, THBS1, LRRC32, ITGB3, PLP2, FZD4, PDPN, GBP1, IL13RA1, ZFP36, IL1RL1, IL18R1, CXCR1, CXCR2, IL1R2, VASN, PRLR                                                                                                                                                                                                                                                                                                                                                                                                                                                                                                                                                     |
| GO:MF  | Cytokine receptor activity     | 3.84E-06 | 99                  | 624                  | 18                     | IL1R1, OSMR, IFNGR2, IL4R, IL6R, FZD4, IL13RA1, IL15RA, CD44, IL1RL1, IL18R1, CXCR1, CXCR2, IL1R2, IL18RAP, IL7R, PRLR, IFNLR1                                                                                                                                                                                                                                                                                                                                                                                                                                                                                                                                                                                 |
| GO:MF  | Immune receptor activity       | 6.62E-05 | 131                 | 624                  | 19                     | IL1R1, OSMR, IFNGR2, IL4R, IL6R, FZD4, IL13RA1, IL15RA, CD44, IL1RL1, IL18R1, FPR2, CXCR1, CXCR2, IL1R2, IL18RAP, IL7R, PRLR, IFNLR1                                                                                                                                                                                                                                                                                                                                                                                                                                                                                                                                                                           |
| GO:MF  | Growth factor binding          | 1.08E-03 | 142                 | 624                  | 18                     | IL1R1, OSMR, CD93, SHC1, COL4A1, IL6R, THBS1, LRRC32, ITGB3, FLT1, IL13RA1, HAP1, HTRA3, IL1R2, FGFR1, KL, VASN, ITGB4                                                                                                                                                                                                                                                                                                                                                                                                                                                                                                                                                                                         |
| GO:MF  | Cell adhesion molecule binding | 3.44E-03 | 506                 | 624                  | 38                     | S1PR3, TAGLN2, CLIC1, MSN, ZC3HAV1, ICAM1, ANXA2, MMP14, BAG3, THBS1, TGFBI, PDLIM1, ITGB3, GPRC5A, CEMIP2, F11R, VASP, LYN, CNN2, ANXA1, TRIM25, GFAP, EPS8L2, SFN, CDH6, MPP7, KRT18, TRPC4, DNAJB1, AHSA1, ARHGAP18, VASN, EPHA2, HSPA1A, CD177, ITGB1BP2, ITGB4, OLFM4                                                                                                                                                                                                                                                                                                                                                                                                                                     |
| GO:BP  | Cytokine-mediated signaling    | 4.71E-26 | 799                 | 617                  | 99                     | TNFRSF1A, STAT3, CASP4, GBP2, IL1R1, OSMR, IFITM2, SHC1, BCL6, MSN, TIMP1, IFNGR2, IFITM3, CEBPD, TNFRSF1B, ICAM1, IFITM1, HGF, MCL1, CDKN1A, ANXA2, LTBR, TNFRSF11B, PIM1, IL4R, BST2, PARP9, IL6R, TRIM5, SOCS3, PTGS2, IRAK3, MYD88, TNIP2, PLP2, MAP3K8, PSMB8, FZD4, B2M, TRIM22, GBP1, CNN2, TNFAIP3, ANXA1, TAB2, TRIM25, IL13RA1, IL15RA, STAT6, NOD1, CD40, NOD2, MYC, TRIM21, CCL2, CD44, CSF1, CXCL2, IL1RL1, IL18R1, CSF3, IGHG4, SP100, NFKBIA, CXCR1, CARD16, IL6, LIF, KRT18, IL32, CXCR2, CISH, IL1R2, NMI, SEM1, IL18RAP, CASP8, FOS, CLDN18, IFI35, JUNB, TNFSF15, MUC1, TNFRSF12A, IL7R, GFI1, HSPA1A, IL15, CXCL1, MMP9, PRLR, OSM, TNFSF18, HSP90AA1, CCL4L2, SPHK1, CCL3L1, IFNLR1, IRF4 |

|              |                              |          |     |     |    |                                                                                                                                                                                                                                                                                                                                                                                                                                                                                                                                                                                                                           |
|--------------|------------------------------|----------|-----|-----|----|---------------------------------------------------------------------------------------------------------------------------------------------------------------------------------------------------------------------------------------------------------------------------------------------------------------------------------------------------------------------------------------------------------------------------------------------------------------------------------------------------------------------------------------------------------------------------------------------------------------------------|
| <b>GO:BP</b> | Inflammatory response        | 2.78E-19 | 780 | 617 | 87 | PLSCR1, TNFRSF1A, STAT3, ANO6, CASP4, NAMPT, IL1R1, OSMR, S1PR3, BCL6, TIMP1, IFNGR2, SMAD1, TNFRSF1B, ICAM1, CEBPB, HGF, IL4R, TGM2, NFKBIZ, NFKB2, IL6R, THBS1, SOCS3, PTGS2, CALCRL, MYD88, B4GALT1, TNIP2, F11R, SERPINA3, MFHAS1, BACE2, SLC7A2, LYN, SBNO2, CHI3L1, S100A9, TNFAIP3, ANXA1, ZFP36, NOD1, CD40, VAMP8, NOD2, F2R, LYZ, CCL2, CD44, NUPR1, CSF1, CXCL2, IL1RL1, IL18R1, FPR2, S100A8, NFKBIA, C4A, LPL, C4B, IL6, MEFV, CXCR2, PTGIR, IL1R2, NMI, TREM1, SNAP23, IL18RAP, TRPV4, PTGER2, FOS, SELE, EPHA2, ZC3H12A, SCUBE1, LDLR, IL15, CXCL1, RELB, MMP9, CD96, OSM, CCL4L2, SPHK1, CCL3L1, SERPINC1 |
| <b>GO:BP</b> | Myeloid leukocyte activation | 8.49E-17 | 657 | 617 | 75 | PLSCR1, ANO6, STOM, NAMPT, CD59, CD93, IFNGR2, TNFRSF1B, PECAM1, ANXA2, LTBR, IL4R, BST2, CMTM6, THBS1, LRG1, B4GALT1, PNP, TNIP2, CD58, B2M, SERPINA3, FES, MFHAS1, SLC7A2, LYN, SBNO2, TMBIM1, CHI3L1, CNN2, HEBP2, PLAU, S100A9, SLC2A3, VAMP8, LYZ, CD44, PLAUR, CSF1, IL1RL1, CRISPLD2, FCAR, SERPINB1, MGAM, FPR2, S100A8, RAB27A, FCGR3B, FABP5, CXCR1, IL6, HVCN1, CXCR2, MVP, SNAP23, IL18RAP, CDA, BATF2, ZC3H12A, RHOH, HSPA1A, FCN1, LDLR, IL15, JMJD6, CD177, CXCL1, RELB, MMP9, LTF, HSP90AA1, SPHK1, PLA2G10, IRF4, OLFM4                                                                                  |
| <b>GO:BP</b> | Leukocyte activation         | 8.96E-12 | 704 | 617 | 69 | STAT3, ANO6, STOM, CD59, CD93, BCL6, TNFRSF1B, PECAM1, ICAM1, ANXA2, IL4R, BST2, NFKBIZ, XBP1, CMTM6, LRG1, B4GALT1, PNP, BCL3, CD58, B2M, SERPINA3, FES, LYN, SBNO2, TMBIM1, CHI3L1, CNN2, HEBP2, PLAU, S100A9, SLC2A3, ANXA1, STAT6, CD40, VAMP8, LYZ, CD44, PLAUR, IL18R1, CRISPLD2, FCAR, SERPINB1, MGAM, FPR2, S100A8, RAB27A, FCGR3B, FABP5, CXCR1, IL6, HVCN1, CXCR2, MVP, SNAP23, CDA, ZC3H12A, HLX, HSPA1A, FCN1, CD177, CXCL1, RELB, MMP9, LTF, TNFSF18, HSP90AA1, IRF4, OLFM4                                                                                                                                  |

|                |                                         |          |     |     |    |                                                                                                                                                                                                                                                                                                                                                                                                                                                                                           |
|----------------|-----------------------------------------|----------|-----|-----|----|-------------------------------------------------------------------------------------------------------------------------------------------------------------------------------------------------------------------------------------------------------------------------------------------------------------------------------------------------------------------------------------------------------------------------------------------------------------------------------------------|
| <b>GO:BP</b>   | Immune cell activation                  | 1.19E-11 | 708 | 617 | 69 | STAT3, ANO6, STOM, CD59, CD93, BCL6, TNFRSF1B, PECAM1, ICAM1, ANXA2, IL4R, BST2, NFKBIZ, XBP1, CMTM6, LRG1, B4GALT1, PNP, BCL3, CD58, B2M, SERPINA3, FES, LYN, SBNO2, TMBIM1, CHI3L1, CNN2, HEBP2, PLAUR, S100A9, SLC2A3, ANXA1, STAT6, CD40, VAMP8, LYZ, CD44, PLAUR, IL18R1, CRISPLD2, FCAR, SERPINB1, MGAM, FPR2, S100A8, RAB27A, FCGR3B, FABP5, CXCR1, IL6, HVCN1, CXCR2, MVP, SNAP23, CDA, ZC3H12A, HLX, HSPA1A, FCN1, CD177, CXCL1, RELB, MMP9, LTF, TNFSF18, HSP90AA1, IRF4, OLFM4 |
| <b>KEGG</b>    | Tnf signaling pathway                   | 4.05E-14 | 112 | 344 | 30 | TNFRSF1A, TNFRSF1B, ICAM1, CEBPB, MMP14, CASP7, SOCS3, PTGS2, FAS, BCL3, MAP3K8, PIK3R3, TNFAIP3, TAB2, NOD2, MLKL, CCL2, CSF1, CXCL2, IL18R1, NFKBIA, IL6, LIF, CASP8, FOS, SELE, JUNB, IL15, CXCL1, MMP9                                                                                                                                                                                                                                                                                |
| <b>KEGG</b>    | Cytokine-cytokine receptor interaction  | 3.75E-11 | 292 | 344 | 44 | TNFRSF1A, IL1R1, OSMR, TNFRSF10B, IFNGR2, TNFRSF1B, LTBR, TNFRSF11B, IL4R, IL6R, TNFRSF10D, FAS, TNFRSF10A, BMPR1A, IL13RA1, IL15RA, CD40, CCL2, CSF1, CXCL2, IL1RL1, IL18R1, CSF3, CXCR1, IL6, LIF, IL32, CXCR2, GDF15, IL1R2, IL18RAP, TNFSF15, BMP4, TNFRSF12A, IL7R, IL15, CXCL1, PRLR, TNFRSF10C, OSM, TNFSF18, CCL4L2, CCL3L1, IFNLR1                                                                                                                                               |
| <b>KEGG</b>    | Nf-kappa b signaling pathway            | 1.72E-07 | 100 | 344 | 21 | TNFRSF1A, IL1R1, ICAM1, LTBR, NFKB2, PTGS2, MYD88, LYN, PLAUR, BCL2A1, TNFAIP3, TAB2, TRIM25, GADD45B, CD40, CXCL2, NFKBIA, DDX58, CXCL1, RELB, CCL4L2                                                                                                                                                                                                                                                                                                                                    |
| <b>KEGG</b>    | Epstein-barr virus infection            | 3.53E-06 | 197 | 344 | 28 | STAT3, CDK2, ICAM1, CDKN1A, NFKB2, NEDD4, TAP1, FAS, MYD88, CD58, B2M, LYN, PIK3R3, TNFAIP3, TAB2, GADD45B, CD40, GADD45A, MYC, CD44, NFKBIA, IL6, RUNX3, SEM1, CASP8, DDX58, TAP2, RELB                                                                                                                                                                                                                                                                                                  |
| <b>KEGG</b>    | Viral protein interaction with cytokine | 4.18E-06 | 98  | 344 | 19 | TNFRSF1A, TNFRSF10B, TNFRSF1B, LTBR, IL6R, TNFRSF10D, TNFRSF10A, CCL2, CSF1, CXCL2, IL18R1, CXCR1, IL6, CXCR2, IL18RAP, CXCL1, TNFRSF10C, CCL4L2, CCL3L1                                                                                                                                                                                                                                                                                                                                  |
| <b>CLINVAR</b> | HIV Type 1                              | 1.48E-03 | NA  | NA  | NA | IL4R; CCL3L1; CXCR1; CCL2                                                                                                                                                                                                                                                                                                                                                                                                                                                                 |
| <b>CLINVAR</b> | Lymphoproliferative syndrome            | 1.92E-02 | NA  | NA  | NA | CASP8; FAS                                                                                                                                                                                                                                                                                                                                                                                                                                                                                |
| <b>CLINVAR</b> | Schizophrenia                           | 3.30E-02 | NA  | NA  | NA | APOL4; SLC1A1; CHI3L1                                                                                                                                                                                                                                                                                                                                                                                                                                                                     |

|                |                      |          |    |    |    |            |
|----------------|----------------------|----------|----|----|----|------------|
| <b>CLINVAR</b> | Hyperlipoproteinemia | 3.42E-02 | NA | NA | NA | LPL; LDLR  |
| <b>CLINVAR</b> | Alzheimer's disease  | 5.23E-02 | NA | NA | NA | NOS3; PLAU |

**Supplementary Table S4.** Selected gene function enrichment results of yellow network-module genes (of which HML6.3p21c is a member) from the co-expression network analysis using the KCL motor cortex. Function enrichment analysis performed using g:profiler and Enrichr.

BP: Biological Process; MF: Molecular Function; KEGG: Kyoto Encyclopaedia of Genes and Genomes pathways; ClinVar: NCBI ClinVar database; P-value: Statistical significance test of gene function enrichment; Term size: Number of genes attributed to the ontological category; Query size: Number of genes from the yellow network-module relevant to the ontological category; Overlap size: Number of genes that overlap between Term size and Query size; Overlapping genes: The genes that overlap between Term size and Query size, and which are contributing to significant enrichment for the ontological category.

| SOURCE | TERM                                                                    | TERM ID    | P-VALUE | ADJ. P-VALUE | TERM SIZE | INTERSECT |
|--------|-------------------------------------------------------------------------|------------|---------|--------------|-----------|-----------|
| GO:MF  | cytokine binding                                                        | GO:0019955 | NA      | 3.96E-07     | 131       | 22        |
| GO:MF  | cytokine receptor activity                                              | GO:0004896 | NA      | 3.84E-06     | 99        | 18        |
| GO:MF  | immune receptor activity                                                | GO:0140375 | NA      | 6.62E-05     | 131       | 19        |
| GO:MF  | growth factor binding                                                   | GO:0019838 | NA      | 0.001075     | 142       | 18        |
| GO:MF  | cell adhesion molecule binding                                          | GO:0050839 | NA      | 0.003438     | 506       | 38        |
| GO:MF  | TRAIL binding                                                           | GO:0045569 | NA      | 0.003845     | 5         | 4         |
| GO:MF  | N-acetylglucosaminide beta-1,6-N-acetylglucosaminyltransferase activity | GO:0008109 | NA      | 0.023074     | 3         | 3         |
| GO:MF  | interleukin-1 receptor activity                                         | GO:0004908 | NA      | 0.025464     | 7         | 4         |
| GO:MF  | ATPase regulator activity                                               | GO:0060590 | NA      | 0.025634     | 39        | 8         |
| GO:MF  | enzyme inhibitor activity                                               | GO:0004857 | NA      | 0.030908     | 379       | 29        |
| GO:BP  | cytokine-mediated signaling pathway                                     | GO:0019221 | NA      | 4.71E-26     | 799       | 99        |
| GO:BP  | inflammatory response                                                   | GO:0006954 | NA      | 2.78E-19     | 780       | 87        |
| GO:BP  | myeloid leukocyte activation                                            | GO:0002274 | NA      | 8.49E-17     | 657       | 75        |
| GO:BP  | leukocyte activation involved in immune response                        | GO:0002366 | NA      | 8.96E-12     | 704       | 69        |
| GO:BP  | cell activation involved in immune response                             | GO:0002263 | NA      | 1.19E-11     | 708       | 69        |
| GO:BP  | response to molecule of bacterial origin                                | GO:0002237 | NA      | 1.76E-11     | 367       | 47        |
| GO:BP  | response to lipopolysaccharide                                          | GO:0032496 | NA      | 4.25E-11     | 347       | 45        |
| GO:BP  | cytokine production                                                     | GO:0001816 | NA      | 6.00E-11     | 837       | 75        |
| GO:BP  | leukocyte mediated immunity                                             | GO:0002443 | NA      | 9.20E-11     | 880       | 77        |
| GO:BP  | response to lipid                                                       | GO:0033993 | NA      | 1.08E-10     | 956       | 81        |
| GO:CC  | cell surface                                                            | GO:0009986 | NA      | 8.40E-09     | 918       | 72        |
| GO:CC  | specific granule                                                        | GO:0042581 | NA      | 4.48E-08     | 158       | 25        |
| GO:CC  | secretory granule                                                       | GO:0030141 | NA      | 2.29E-06     | 839       | 62        |
| GO:CC  | tertiary granule                                                        | GO:0070820 | NA      | 1.17E-05     | 163       | 22        |
| GO:CC  | specific granule membrane                                               | GO:0035579 | NA      | 1.8E-05      | 90        | 16        |
| GO:CC  | extracellular matrix                                                    | GO:0031012 | NA      | 0.000136     | 534       | 42        |
| GO:CC  | secretory granule membrane                                              | GO:0030667 | NA      | 0.000138     | 299       | 29        |
| GO:CC  | collagen-containing extracellular matrix                                | GO:0062023 | NA      | 0.000463     | 407       | 34        |
| GO:CC  | secretory granule lumen                                                 | GO:0034774 | NA      | 0.001554     | 319       | 28        |
| GO:CC  | tertiary granule membrane                                               | GO:0070821 | NA      | 0.001694     | 72        | 12        |
| KEGG   | TNF signaling pathway                                                   | KEGG:04668 | NA      | 4.05E-14     | 112       | 30        |
| KEGG   | Cytokine-cytokine receptor interaction                                  | KEGG:04060 | NA      | 3.75E-11     | 292       | 44        |
| KEGG   | NF-kappa B signaling pathway                                            | KEGG:04064 | NA      | 1.72E-07     | 100       | 21        |
| KEGG   | Epstein-Barr virus infection                                            | KEGG:05169 | NA      | 3.53E-06     | 197       | 28        |
| KEGG   | Viral protein interaction with cytokine and cytokine receptor           | KEGG:04061 | NA      | 4.18E-06     | 98        | 19        |
| KEGG   | Osteoclast differentiation                                              | KEGG:04380 | NA      | 1.09E-05     | 125       | 21        |
| KEGG   | JAK-STAT signaling pathway                                              | KEGG:04630 | NA      | 1.58E-05     | 162       | 24        |
| KEGG   | IL-17 signaling pathway                                                 | KEGG:04657 | NA      | 4.54E-05     | 92        | 17        |
| KEGG   | Fluid shear stress and atherosclerosis                                  | KEGG:05418 | NA      | 0.000873     | 137       | 19        |
| KEGG   | Pathways in cancer                                                      | KEGG:05200 | NA      | 0.001409     | 529       | 45        |
| KEGG   | Human T-cell leukemia virus 1 infection                                 | KEGG:05166 | NA      | 8.00E-03     | 216       | 23        |
| REAC   | Cytokine Signaling in Immune system                                     | 1280215    | NA      | 5.55E-18     | 831       | 93        |

|                |                                                             |         |          |          |     |    |
|----------------|-------------------------------------------------------------|---------|----------|----------|-----|----|
| <b>REAC</b>    | Signaling by Interleukins                                   | 449147  | NA       | 5.58E-17 | 459 | 65 |
| <b>REAC</b>    | Interleukin-4 and Interleukin-13 signaling                  | 6785807 | NA       | 8.34E-14 | 110 | 29 |
| <b>REAC</b>    | Interleukin-10 signaling                                    | 6783783 | NA       | 3.41E-09 | 45  | 16 |
| <b>REAC</b>    | Neutrophil degranulation                                    | 6798695 | NA       | 3.97E-07 | 476 | 49 |
| <b>REAC</b>    | Interferon Signaling                                        | 913531  | NA       | 0.001245 | 193 | 23 |
| <b>REAC</b>    | Interferon gamma signaling                                  | 877300  | NA       | 0.003809 | 87  | 14 |
| <b>REAC</b>    | Interleukin-1 family signaling                              | 446652  | NA       | 0.004364 | 138 | 18 |
| <b>REAC</b>    | Interleukin-6 family signaling                              | 6783589 | NA       | 0.014005 | 24  | 7  |
| <b>REAC</b>    | TP53 Regulates Transcription of Death Receptors and Ligands | 6803211 | NA       | 0.029398 | 12  | 5  |
| <b>CLINVAR</b> | human immunodeficiency virus type 1, susceptibility to      | NA      | 0.001482 | 0.269767 | NA  | NA |
| <b>CLINVAR</b> | atypical hemolytic uremic syndrome                          | NA      | 0.00378  | 0.34402  | NA  | NA |
| <b>CLINVAR</b> | hemolytic-uremic syndrome                                   | NA      | 0.00378  | 0.229347 | NA  | NA |
| <b>CLINVAR</b> | holoprosencephaly sequence                                  | NA      | 0.00525  | 0.238888 | NA  | NA |
| <b>CLINVAR</b> | autoimmune lymphoproliferative syndrome                     | NA      | 0.019245 | 0.700529 | NA  | NA |
| <b>CLINVAR</b> | postmenopausal osteoporosis                                 | NA      | 0.019245 | 0.583774 | NA  | NA |
| <b>CLINVAR</b> | pure gonadal dysgenesis 46,xy                               | NA      | 0.019245 | 0.500378 | NA  | NA |
| <b>CLINVAR</b> | hypogonadism with anosmia                                   | NA      | 0.019245 | 0.43783  | NA  | NA |
| <b>CLINVAR</b> | schizophrenia                                               | NA      | 0.032968 | 0.66669  | NA  | NA |
| <b>CLINVAR</b> | venous thrombosis                                           | NA      | 0.034171 | 0.621918 | NA  | NA |

**Supplementary Table S5.** Expanded gene function enrichment results of yellow network-module genes (of which HML6.3p21c is a member) from the co-expression network analysis using the KCL motor cortex. Function enrichment analysis performed using g:profiler and Enrichr, which includes KEGG pathways<sup>10-12</sup>. BP: Biological Process; MF: Molecular Function; CC: Cell Component

| Gene/ERV             | Log2FC       | P-value         | Gene/ERV | Log2FC | P-value | Gene/ERV | Log2FC | P-value |
|----------------------|--------------|-----------------|----------|--------|---------|----------|--------|---------|
| <b>HML6.3p21.31c</b> | <b>0.691</b> | <b>2.29E-05</b> | FAM198A  | 0.294  | 0.008   | SLCO4A1  | 0.395  | 0.027   |
| ITPKB                | 0.373        | 3.14E-05        | COL4A2   | 0.472  | 0.009   | ANO6     | 0.156  | 0.027   |
| ANOS1                | 0.544        | 3.97E-05        | SAMD11   | 0.760  | 0.009   | LAMB4    | 0.559  | 0.027   |
| MAOB                 | 0.381        | 1.47E-04        | SYNM     | 0.263  | 0.009   | SLC15A5  | 0.826  | 0.027   |
| GFAP                 | 0.749        | 2.37E-04        | PHLDA1   | 0.220  | 0.009   | GEM      | 0.454  | 0.028   |
| CSRNP1               | 0.463        | 3.33E-04        | TSPAN33  | 0.279  | 0.010   | NT5DC2   | 0.269  | 0.028   |
| ROR2                 | -1.018       | 3.71E-04        | NINJ1    | 0.219  | 0.012   | TMEM102  | 0.461  | 0.029   |
| DPYSL3               | 0.342        | 4.87E-04        | SULF1    | 0.360  | 0.012   | ITGB1BP2 | 0.574  | 0.030   |
| ECHDC3               | 0.911        | 0.001           | CREM     | 0.237  | 0.012   | IFNLR1   | 0.399  | 0.030   |
| TNFRSF12A            | 0.905        | 0.001           | SGCZ     | 0.288  | 0.013   | MCL1     | 0.207  | 0.030   |
| APOLD1               | 0.718        | 0.001           | ARHGAP18 | 0.398  | 0.013   | POMC     | -0.570 | 0.030   |
| CD44                 | 0.966        | 0.001           | SLC1A1   | 0.224  | 0.013   | SLC2A14  | -0.314 | 0.032   |
| WWTR1                | 0.347        | 0.001           | EPHA2    | 0.530  | 0.013   | PLEKHA4  | 0.265  | 0.034   |
| CD58                 | 0.590        | 0.001           | LPL      | 0.355  | 0.014   | BEND4    | 0.291  | 0.036   |
| MAFF                 | 0.478        | 0.001           | CFB      | -0.487 | 0.014   | TRIP10   | 0.354  | 0.036   |
| LTF                  | 1.382        | 0.001           | CDC45    | 0.976  | 0.014   | WNT16    | 0.521  | 0.038   |
| NUDT4                | 0.301        | 0.002           | EMP3     | 0.468  | 0.014   | CCDC80   | 0.445  | 0.039   |
| GCH1                 | 0.604        | 0.002           | MYL12A   | 0.266  | 0.015   | TUBB6    | 0.273  | 0.039   |
| P2RY2                | 0.717        | 0.002           | TMEM176A | 0.347  | 0.016   | TMEM176B | 0.373  | 0.040   |
| HGF                  | 0.623        | 0.003           | WDR1     | 0.204  | 0.016   | B2M      | 0.316  | 0.040   |
| EMP1                 | 0.600        | 0.003           | KCTD12   | 0.313  | 0.016   | GPR4     | 0.357  | 0.040   |
| GPR6                 | 0.870        | 0.003           | CHI3L1   | 0.695  | 0.016   | GBP1     | 0.387  | 0.042   |
| LRRCS5               | 0.365        | 0.003           | RNF152   | 0.293  | 0.017   | DCST1    | -0.450 | 0.043   |
| PARM1                | 0.297        | 0.003           | CLIC2    | 0.374  | 0.017   | CD59     | 0.217  | 0.045   |
| AQP1                 | 0.925        | 0.003           | TM4SF1   | 0.466  | 0.018   | FXD3     | 0.278  | 0.047   |
| SERPINA3             | 1.330        | 0.004           | MCTP2    | 0.420  | 0.019   | PLSCR1   | 0.345  | 0.048   |
| SH3BP2               | 0.296        | 0.004           | A4GALT   | 0.496  | 0.019   | VWA5A    | 0.229  | 0.049   |
| CHI3L2               | 0.856        | 0.004           | AGAP10P  | -1.360 | 0.019   | FCN3     | 0.779  | 0.049   |
| KCTD19               | -0.574       | 0.004           | LVRN     | 0.761  | 0.019   | ICAM1    | 0.382  | 0.049   |
| RASL12               | 0.556        | 0.004           | OSMR     | 0.407  | 0.021   |          |        |         |
| NFKBIA               | 0.317        | 0.005           | RCC1     | 0.336  | 0.022   |          |        |         |
| PIK3R3               | 0.299        | 0.005           | DSE      | 0.232  | 0.022   |          |        |         |
| TRHDE                | 0.292        | 0.005           | PECAM1   | 0.285  | 0.023   |          |        |         |
| TEAD3                | 0.525        | 0.006           | PALLD    | 0.238  | 0.023   |          |        |         |
| IL6                  | 1.378        | 0.006           | CCL2     | 0.955  | 0.023   |          |        |         |
| S1PR3                | 0.337        | 0.006           | YBX3     | 0.448  | 0.023   |          |        |         |
| SLC7A2               | 0.472        | 0.006           | PXDC1    | 0.323  | 0.025   |          |        |         |
| S100A10              | 0.499        | 0.007           | TMEM263  | 0.168  | 0.026   |          |        |         |
| IMPG2                | 0.303        | 0.008           | ZFP36L2  | 0.245  | 0.026   |          |        |         |

**Supplementary Table S6.** Differential expression analysis of genes comparing ALS donors with controls for the yellow co-expression network-module using the KCL cohort. HML6\_3p21.31c was the most significant genomic element to associate with ALS in this network.

Log2FC: Log2 Fold-Change



| SOURCE | TERM                                                | TERM ID        | P-VALUE | ADJ. P-VALUE | TERM SIZE |     |
|--------|-----------------------------------------------------|----------------|---------|--------------|-----------|-----|
| GO:MF  | immune receptor activity                            | GO:014037<br>5 | NA      | 2.80E-08     | 131       | 26  |
| GO:MF  | cytokine binding                                    | GO:001995<br>5 | NA      | 4.49E-06     | 131       | 23  |
| GO:MF  | cytokine receptor activity                          | GO:000489<br>6 | NA      | 2.06E-05     | 99        | 19  |
| GO:MF  | Toll-like receptor binding                          | GO:003532<br>5 | NA      | 0.000105     | 12        | 7   |
| GO:MF  | IgG binding                                         | GO:001986<br>4 | NA      | 0.000686     | 10        | 6   |
| GO:MF  | lipid binding                                       | GO:000828<br>9 | NA      | 0.000903     | 741       | 60  |
| GO:MF  | pattern recognition receptor activity               | GO:003818<br>7 | NA      | 0.00127      | 22        | 8   |
| GO:MF  | virus receptor activity                             | GO:000161<br>8 | NA      | 0.001873     | 75        | 14  |
| GO:MF  | immunoglobulin binding                              | GO:001986<br>5 | NA      | 0.001874     | 23        | 8   |
| GO:MF  | exogenous protein binding                           | GO:014027<br>2 | NA      | 0.002207     | 76        | 14  |
| GO:MF  | phosphotyrosine residue binding                     | GO:000178<br>4 | NA      | 0.004053     | 41        | 10  |
| GO:BP  | myeloid leukocyte activation                        | GO:000227<br>4 | NA      | 7.20E-51     | 657       | 132 |
| GO:BP  | leukocyte mediated immunity                         | GO:000244<br>3 | NA      | 2.12E-44     | 880       | 144 |
| GO:BP  | cell activation involved in immune response         | GO:000226<br>3 | NA      | 8.87E-44     | 708       | 128 |
| GO:BP  | leukocyte activation involved in immune response    | GO:000236<br>6 | NA      | 2.74E-43     | 704       | 127 |
| GO:BP  | myeloid cell activation involved in immune response | GO:000227<br>5 | NA      | 3.24E-41     | 542       | 109 |
| GO:BP  | leukocyte degranulation                             | GO:004329<br>9 | NA      | 3.28E-41     | 532       | 108 |
| GO:BP  | regulated exocytosis                                | GO:004505<br>5 | NA      | 2.26E-40     | 793       | 131 |
| GO:BP  | myeloid leukocyte mediated immunity                 | GO:000244<br>4 | NA      | 7.70E-40     | 549       | 108 |
| GO:BP  | exocytosis                                          | GO:000688<br>7 | NA      | 1.43E-38     | 907       | 138 |
| GO:BP  | cytokine production                                 | GO:000181<br>6 | NA      | 2.03E-38     | 837       | 132 |
| GO:CC  | secretory granule                                   | GO:003014<br>1 | NA      | 1.03E-27     | 839       | 115 |
| GO:CC  | secretory granule membrane                          | GO:003066<br>7 | NA      | 1.16E-19     | 299       | 57  |
| GO:CC  | tertiary granule                                    | GO:007082<br>0 | NA      | 7.06E-15     | 163       | 37  |
| GO:CC  | lytic vacuole                                       | GO:000032<br>3 | NA      | 6.65E-13     | 697       | 78  |
| GO:CC  | lysosome                                            | GO:000576<br>4 | NA      | 6.65E-13     | 697       | 78  |
| GO:CC  | specific granule                                    | GO:004258<br>1 | NA      | 8.02E-13     | 158       | 34  |
| GO:CC  | cytoplasmic vesicle membrane                        | GO:003065<br>9 | NA      | 1.43E-12     | 780       | 83  |
| GO:CC  | cell surface                                        | GO:000998<br>6 | NA      | 1.64E-12     | 918       | 92  |
| GO:CC  | vesicle membrane                                    | GO:001250<br>6 | NA      | 2.22E-12     | 801       | 84  |
| GO:CC  | tertiary granule membrane                           | GO:007082<br>1 | NA      | 3.16E-12     | 72        | 23  |
| KEGG   | Tuberculosis                                        | KEGG:0515<br>2 | NA      | 1.19E-11     | 175       | 37  |

|         |                                                                          |            |          |          |     |    |
|---------|--------------------------------------------------------------------------|------------|----------|----------|-----|----|
| KEGG    | Osteoclast differentiation                                               | KEGG:04380 | NA       | 1.37E-11 | 125 | 31 |
| KEGG    | NOD-like receptor signaling pathway                                      | KEGG:04621 | NA       | 9.99E-09 | 177 | 33 |
| KEGG    | Leishmaniasis                                                            | KEGG:05140 | NA       | 2.73E-07 | 72  | 19 |
| KEGG    | Fc gamma R-mediated phagocytosis                                         | KEGG:04666 | NA       | 6.85E-07 | 92  | 21 |
| KEGG    | B cell receptor signaling pathway                                        | KEGG:04662 | NA       | 1.46E-06 | 79  | 19 |
| KEGG    | Pertussis                                                                | KEGG:05133 | NA       | 4.57E-06 | 76  | 18 |
| KEGG    | Complement and coagulation cascades                                      | KEGG:04610 | NA       | 5.25E-06 | 85  | 19 |
| KEGG    | Platelet activation                                                      | KEGG:04611 | NA       | 3.68E-05 | 124 | 22 |
| KEGG    | Toll-like receptor signaling pathway                                     | KEGG:04620 | NA       | 0.000109 | 102 | 19 |
| REAC    | Neutrophil degranulation                                                 | 6798695    | NA       | 3.08E-27 | 175 | 91 |
| REAC    | Cytokine Signaling in Immune system                                      | 1280215    | NA       | 1.57E-09 | 125 | 89 |
| REAC    | Signaling by Interleukins                                                | 449147     | NA       | 2.76E-09 | 177 | 60 |
| REAC    | Toll-like Receptor Cascades                                              | 168898     | NA       | 7.36E-09 | 72  | 31 |
| REAC    | Platelet activation, signaling and aggregation                           | 76002      | NA       | 6.19E-08 | 92  | 40 |
| REAC    | Diseases associated with the TLR signaling cascade                       | 5602358    | NA       | 2.95E-06 | 79  | 11 |
| REAC    | Diseases of Immune System                                                | 5260271    | NA       | 2.95E-06 | 76  | 11 |
| REAC    | Adaptive Immune System                                                   | 1280218    | NA       | 3.27E-06 | 85  | 78 |
| REAC    | Immunoregulatory interactions between a Lymphoid and a non-Lymphoid cell | 198933     | NA       | 1.17E-05 | 124 | 29 |
| REAC    | Trafficking and processing of endosomal TLR                              | 1679131    | NA       | 1.82E-05 | 102 | 8  |
| CLINVAR | chronic granulomatous disease                                            | NA         | 1.67E-07 | 3.04E-05 | NA  | NA |
| CLINVAR | human immunodeficiency virus type 1, susceptibility to                   | NA         | 2.39E-04 | 0.02176  | NA  | NA |
| CLINVAR | mycobacterium tuberculosis, susceptibility to                            | NA         | 0.00817  | 0.496068 | NA  | NA |
| CLINVAR | systemic lupus erythematosus                                             | NA         | 0.01087  | 0.494938 | NA  | NA |
| CLINVAR | non-hodgkin lymphoma                                                     | NA         | 0.01784  | 0.649737 | NA  | NA |
| CLINVAR | ischemic stroke                                                          | NA         | 0.01784  | 0.541447 | NA  | NA |
| CLINVAR | atrial fibrillation                                                      | NA         | 0.02599  | 0.67591  | NA  | NA |
| CLINVAR | congenital myopathy with fiber type disproportion                        | NA         | 0.02599  | 0.591422 | NA  | NA |
| CLINVAR | limb-girdle muscular dystrophies, autosomal dominant                     | NA         | 0.05714  | 1        | NA  | NA |
| CLINVAR | alzheimer's disease                                                      | NA         | 0.06938  | 1        | NA  | NA |

**Supplementary Table S7.** Gene function enrichment results of brown network-module genes (of which HML6.3p21c is a member) from the co-expression network analysis using the GSE137810 lateral motor cortex. Function enrichment analysis performed using g:profiler and Enrichr, which includes KEGG pathways<sup>10-12</sup>. BP: Biological Process; MF: Molecular Function; CC: Cell Component

| <i>Symbol</i>                    | <i>Log2 Fold-Change</i> | <i>Log2FC Stand. Error</i> | <i>P-value</i>  | <i>IHW Adjusted p-value</i> |
|----------------------------------|-------------------------|----------------------------|-----------------|-----------------------------|
| <b><i>HML6_3p21.3<br/>1c</i></b> | <b>0.691</b>            | <b>0.163</b>               | <b>2.29E-05</b> | <b>0.038</b>                |
| <i>CCR3</i>                      | -0.180                  | 0.188                      | 0.339           | 0.854                       |
| <i>CCR1</i>                      | 0.131                   | 0.327                      | 0.689           | 1                           |
| <i>CCR2</i>                      | 0.549                   | 0.517                      | 0.289           | 1                           |
| <i>CCR5</i>                      | 0.381                   | 0.439                      | 0.386           | 1                           |
| <i>CCRL2</i>                     | 0.412                   | 0.322                      | 0.201           | 1                           |
| <i>LTF</i>                       | 1.382                   | 0.435                      | 0.001           | 0.283                       |
| <i>RTP3</i>                      | 0.214                   | 0.819                      | 0.793           | 1                           |

**Supplementary Table S8.** Differential expression between ALS and controls for genes proximal to HML6\_3p21.31c ERV in the KCL motor cortex dataset. IHW: Independent Hypothesis Weighting. Log2FC: Log2 Fold-Change

|                  |                 | <i>ERV<br/>Direction</i> | <i>N.<br/>Ervs</i> | <i>Beta</i>  | <i>SD</i>    | <i>SE</i>    | <i>2018 GWAS<br/>P-value</i> | <i>2016 GWAS Meta<br/>P-value</i> | <i>2016 GWAS LMM<br/>P-value</i> |       |
|------------------|-----------------|--------------------------|--------------------|--------------|--------------|--------------|------------------------------|-----------------------------------|----------------------------------|-------|
| <i>KCL</i>       | <b>Prim. MC</b> | <b>Up</b>                | <b>29</b>          | <b>0.315</b> | <b>0.032</b> | <b>0.178</b> | <b>0.039</b>                 | <b>0.043</b>                      | <b>0.074</b>                     |       |
|                  |                 | Down                     | 42                 | 0.066        | 0.008        | 0.150        | 0.331                        | 0.743                             | 0.584                            |       |
| <i>GSE137810</i> | <b>Lat. MC</b>  | Up                       | 75                 | 0.010        | 0.002        | 0.113        | 0.465                        | 0.447                             | 0.235                            |       |
|                  |                 | Down                     | 39                 | 0.002        | 0.000        | 0.164        | 0.496                        | 0.865                             | 0.725                            |       |
|                  | <b>Med. MC</b>  | Up                       | 132                | 0.087        | 0.018        | 0.089        | 0.165                        | 0.217                             | 0.118                            |       |
|                  |                 | Down                     | 37                 | 0.062        | 0.007        | 0.153        | 0.342                        | 0.541                             | 0.677                            |       |
|                  |                 | <b>Cere.</b>             | Up                 | 120          | 0.073        | 0.015        | 0.093                        | 0.216                             | 0.274                            | 0.228 |
|                  |                 |                          | Down               | 50           | -0.180       | -0.024       | 0.149                        | 0.888                             | 0.995                            | 0.999 |
| <i>GSE67196</i>  | <b>Cere.</b>    | Up                       | 126                | 0.129        | 0.027        | 0.088        | 0.070                        | 0.187                             | 0.208                            |       |
|                  |                 | Down                     | 3                  | 0.444        | 0.014        | 0.739        | 0.274                        | 0.127                             | 0.318                            |       |

**Supplementary Table S9.** Results from the ERV-set MAGMA analysis using the ALS GWAS summary datasets. Beta, standard deviation and errors reported from the 2018 ALS GWAS. Last two columns taken from the 2016 ALS linear mixed model and meta-analysis GWAS. ERVs that show increased expression in post-mortem ALS (with an association p-value < 0.05), compared to controls, show a marginal enrichment of SNPs that modify ALS risk across 3 GWAS. Note that there are overlapping samples between the three GWAS. Prim. MC: Primary Motor Cortex, Lat MC: Lateral Motor Cortex, Med. MC: Medial Motor Cortex, Cere: Cerebellum. N. Ervs: Number of ERV loci tested. SD: Beta standard deviation. SE: Standard Error. 2018 GWAS: Nicolas et al. 2016 GWAS: van Rheenen and Shatunov et al. 2016.
